# Supplementary material
Source: Springer Nature journal article supplement (https://www.springermedizin.de/resource/supplementary/13690_2013_52_MOESM5_ESM.pdf/9422518)

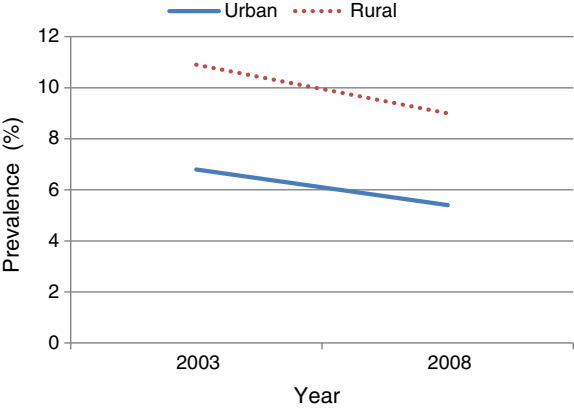

Supplement: MOESM5 [file 9422518]
